# Supplementary material for: Green fabrication of fabric by ethanol/water solvent-mediated self-assembly of homogeneous lignin for oil–water separation
Source: Royal Society of Chemistry journal article supplement (doi:10.1039/d3gc04160c), 2024-01-01
Supplement: d3gc04160c1.pdf [file d3gc04160c1.pdf]

## **Green fabrication of fabric by ethanol/water solvent mediated self-assembly of homogeneous lignin for oil-water separation**

Xinlu Liu <sup>a,b</sup>, Shuzhen Ni <sup>a,b,\*</sup>, Xiaoqian Chen <sup>a,b,\*</sup>, Zongquan Li <sup>a,b</sup>, Yingjuan Fu <sup>a,b</sup>, Menghua Qin <sup>c</sup>, Fengshan Zhang <sup>d</sup>

<sup>a</sup> Key Laboratory of Pulp and Paper Science & Technology of Ministry of Education, Faculty of Light Industry

<sup>b</sup> State Key Laboratory of Biobased Material and Green Papermaking, Faculty of Light Industry, Qilu University of Technology (Shandong Academy of Sciences), Jinan 250353, China

<sup>c</sup> College of Chemistry and Chemical Engineering, Qilu Normal University, Jinan 250200, China

<sup>d</sup> Shandong Huatai Paper Co., Ltd. & Shandong Yellow Triangle Biotechnology Industry Research Institute Co. LTD, China

\* Corresponding author

nishuzhen@qlu.edu.cn (S. Ni); chenxiaoqian@qlu.edu.cn (X. Chen).

## Methods

### *Surface energy*

The surface energy (SE) of cotton fabrics was calculated according to WORK method. The contact angle values of water and ethylene glycol determined by OCA-50 with four replicates were conducted. The surface tension (SFT) of the water and ethylene glycol with disperse ( $\gamma_{LD}$ ) and polar ( $\gamma_{LP}$ ) fractions was got by the software of OCA-50 (Table S1). The contact angles of the water and ethylene glycol of cotton fabric were used to calculate the polar and disperse force according to Eq. (1).

$$\frac{1}{2}(1 + \cos\theta) \frac{\gamma_{LV}}{\sqrt{\gamma_L^d}} = \sqrt{\gamma_S^p} \sqrt{\frac{\gamma_L^p}{\gamma_L^d}} + \sqrt{\gamma_S^d} \quad (1)$$

Where,  $\theta$  ( $^\circ$ ) refers to directly measured contact angle ;  $\gamma_{LV}$  refers to surface tension of a liquid ;  $\gamma_L^d$  refers to disperse fraction of  $\gamma_{LV}$ ;  $\gamma_S^p$  refers to polar fraction of  $\gamma_S$ ;  $\gamma_L^p$  refers to polar fraction of  $\gamma_{LV}$ ;  $\gamma_S^d$  refers to disperse fraction of the  $\gamma_{LV}$ .

### *Loading amount and percentage*

The amount of FLP/Fe particle loaded on cotton fabrics was calculated according to Eq. (2) and (3):

$$\text{Loading amount (g/m}^2\text{)} = (W_2 - W_1)/S \quad (2)$$

$$\text{Loading percentage (\%)} = (W_2 - W_1)/ W_1 \quad (3)$$

where,  $W_1$  (g) and  $W_2$  (g) refer to the weight of pure fabric and FLP/Fe@ cotton fabric, respectively.  $S$  ( $\text{m}^2$ ) refers to the area of fabric.

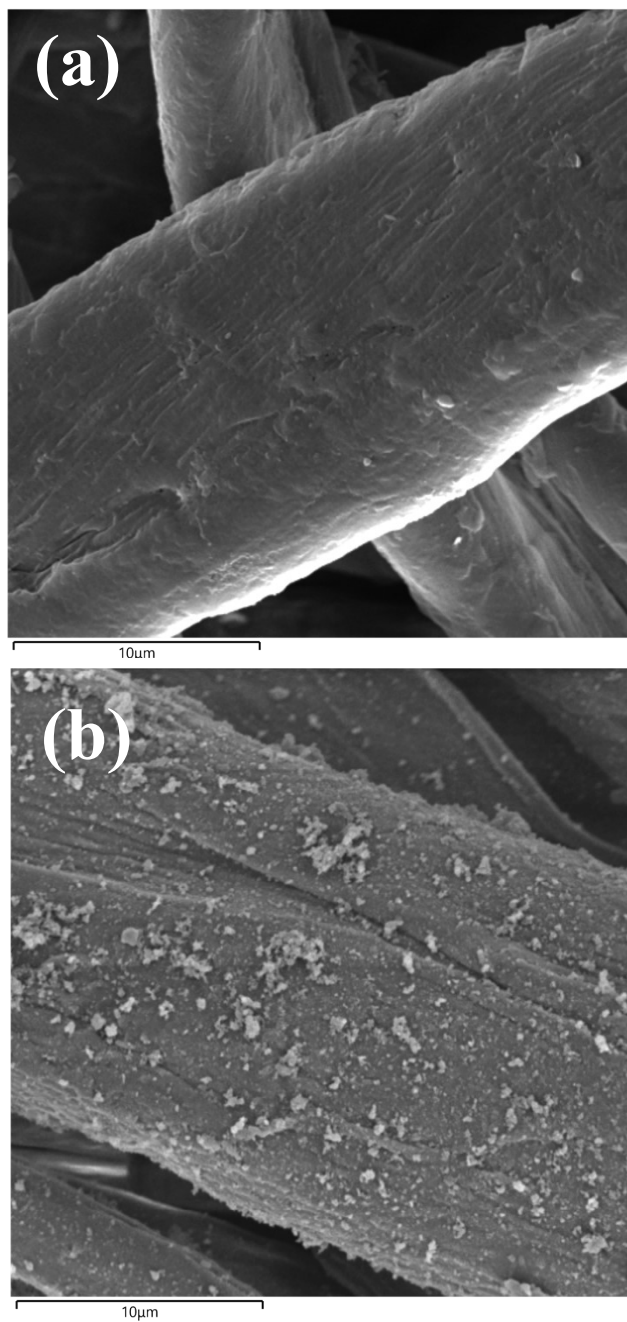

**Fig.S1** The SEM of EDX bright field images of pristine cotton fabric (a) and FLP-50/Fe@ cotton fabric (b)

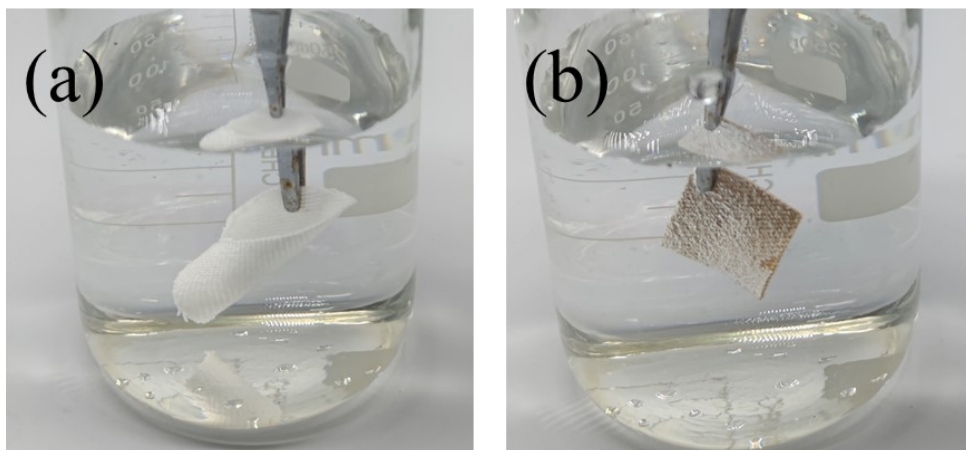

**Fig.S2** The water wettability images of (a) pristine cotton fabric and (b) FLP-50/Fe@ cotton fabric

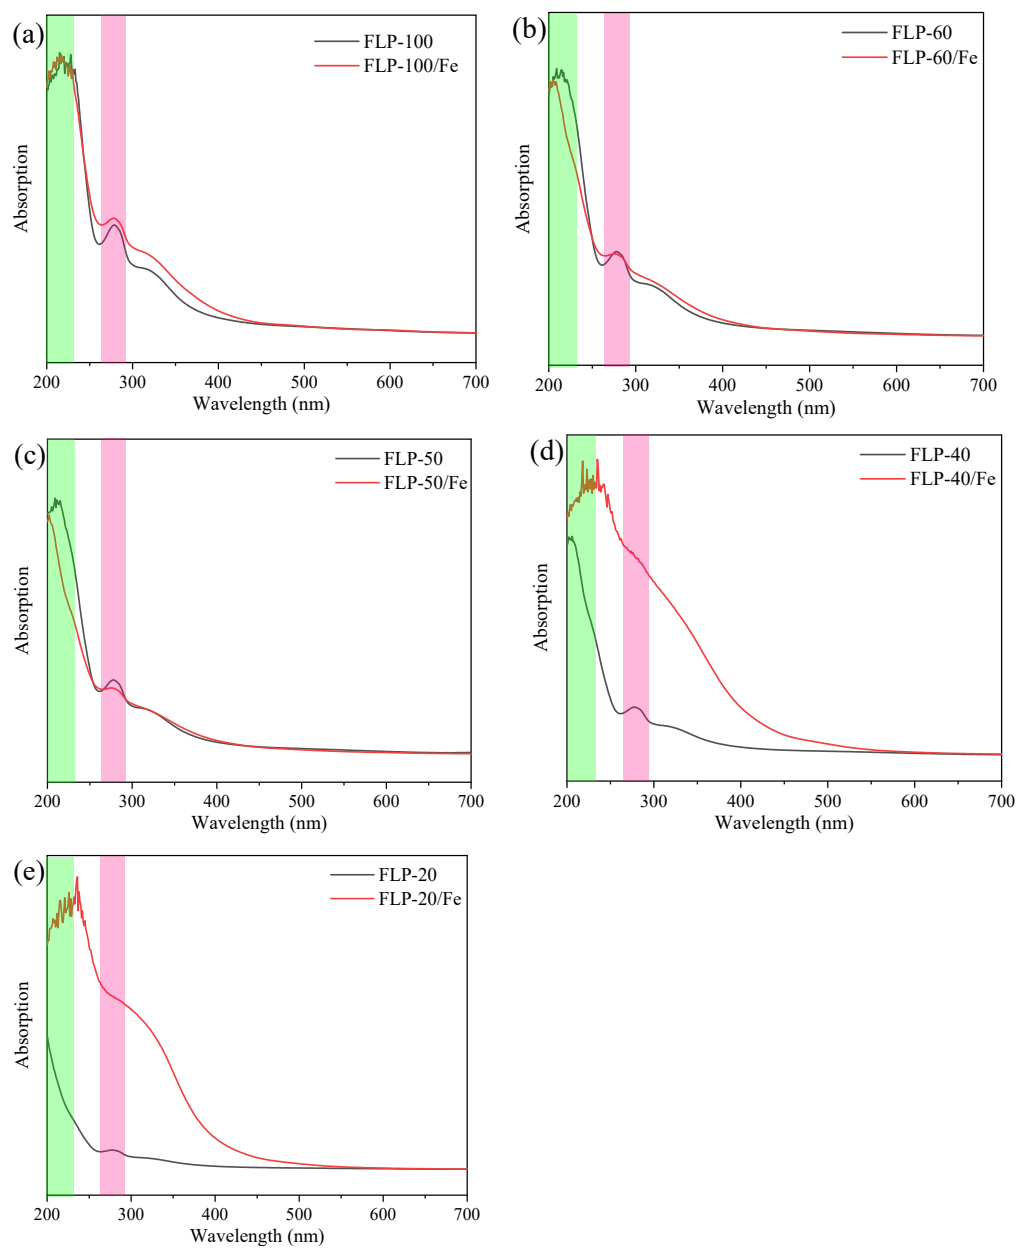

**Fig.S3** UV-vis spectra of (a) FLP-100, FLP-100/Fe, (b) FLP-60, FLP-60/Fe, (c) FLP-50, FLP-50/Fe, (d) FLP-40, FLP-40/Fe and (e) FLP-20, FLP-20/Fe

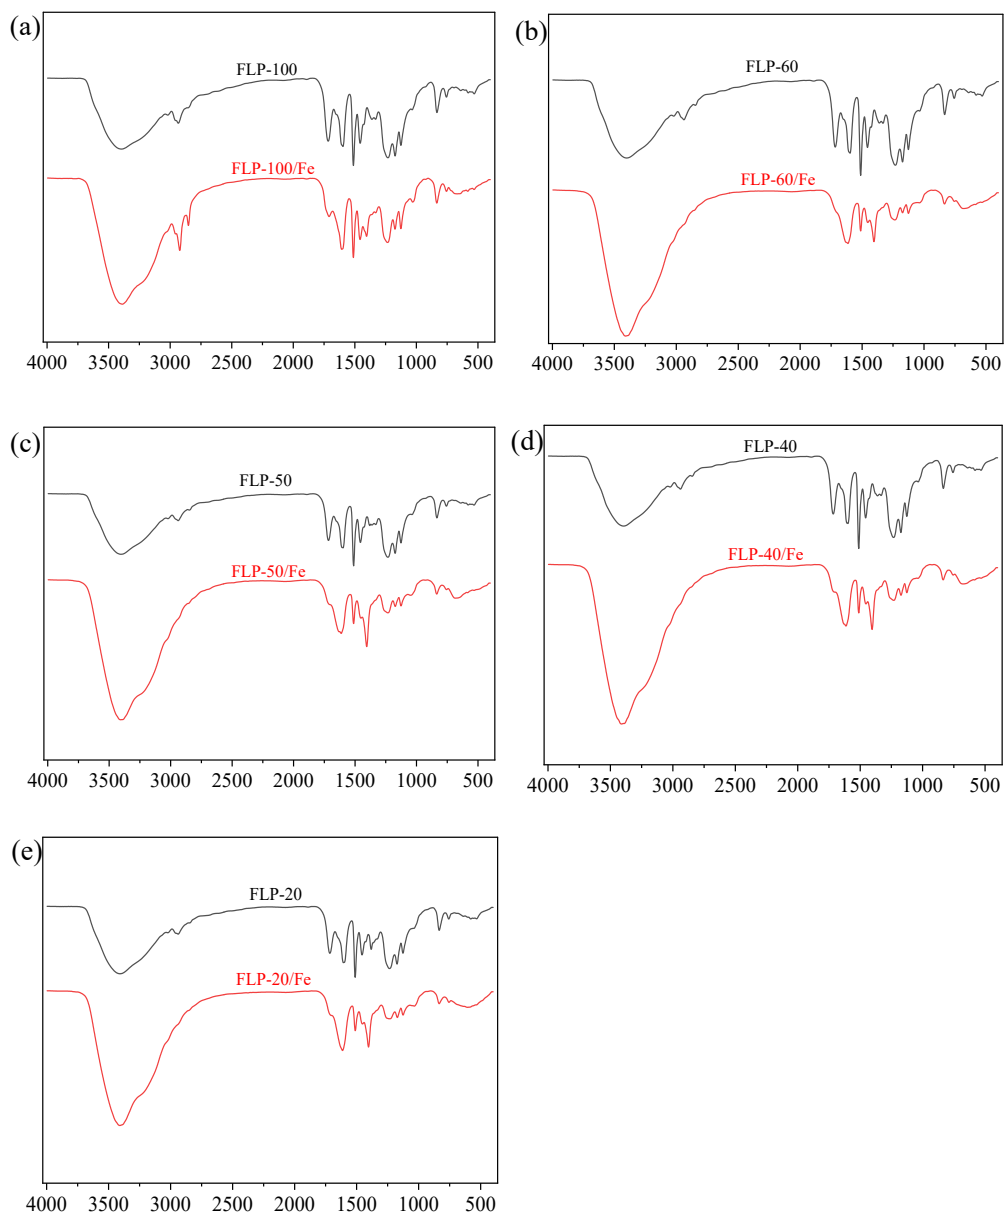

**Fig.S4** FTIR spectra of (a) FLP-100, FLP-100/Fe, (b) FLP-60, FLP-60/Fe, (c) FLP-50, FLP-50/Fe, (d) FLP-40, FLP-40/Fe and (e) FLP-20, FLP-20/Fe

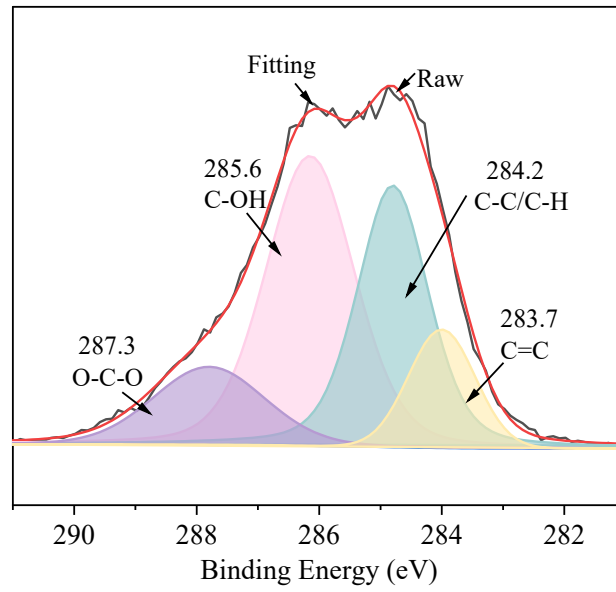

**Fig.S5** High resolution C 1s of pristine fabric

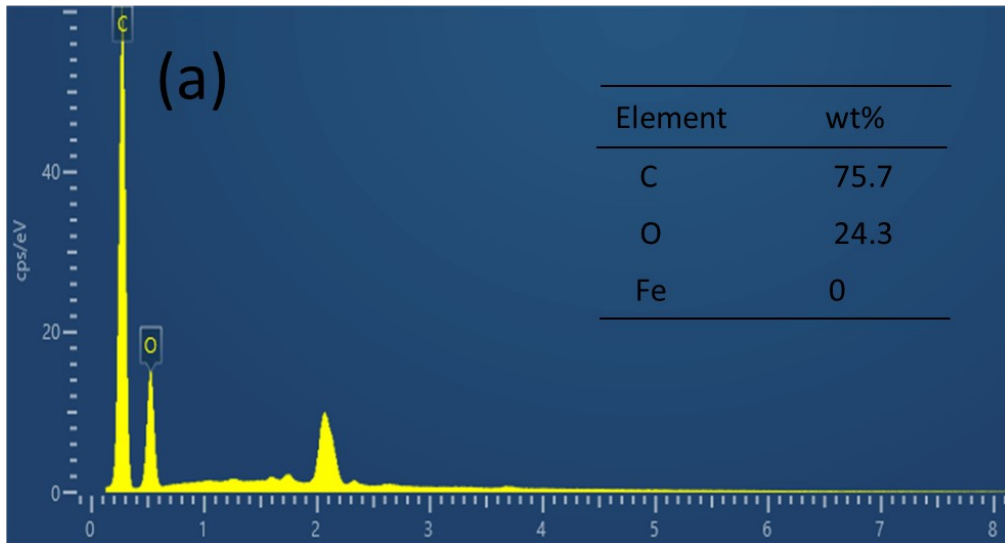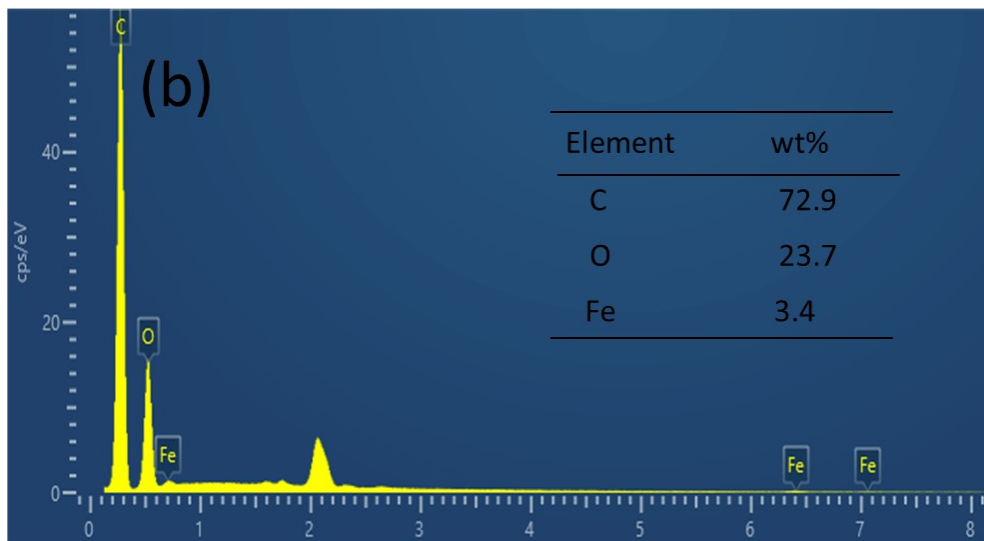

**Fig.S6** EDS of pristine cotton fabric (a) and FLP-50/Fe@ cotton fabric (b)



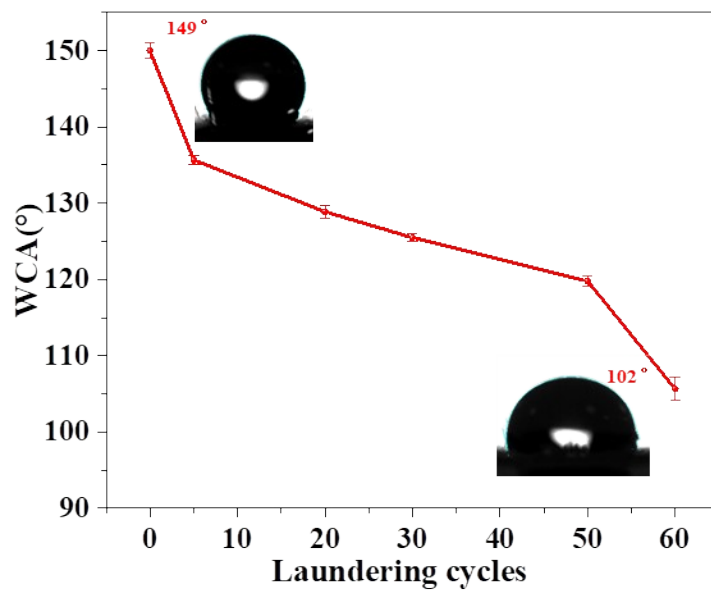

**Fig.S7** The effect of laundering cycles on the water contact angle of FLP-50/Fe@ cotton fabric.

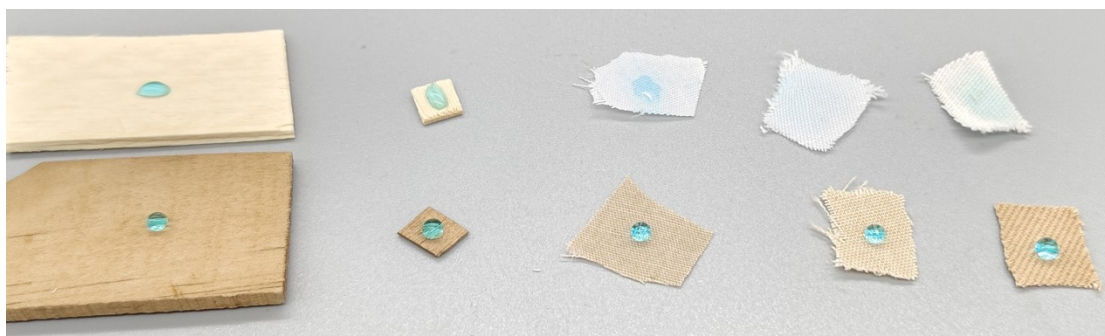

**Fig.S8** The images of water droplet on pristine substrate (First line from left to right: wood, straw and composite fabric (65%polyester-35%cotton, 80%polyester-20%cotton, and 100%cotton)) and corresponding images on modified substrate in second line after the deposition of FLP/Fe.

**Table S1.** The contents of functional groups of FLP based on quantitative  $^{31}\text{P}$  NMR spectra (mmol/g).

|             | syringyl<br>OH | guaiacyl<br>OH | p-hydroxyphenyl<br>OH | total<br>phenolic<br>OH | aliphatic<br>OH | COOH |
|-------------|----------------|----------------|-----------------------|-------------------------|-----------------|------|
| FLP-<br>100 | 0.22           | 2.94           | 0.05                  | 3.21                    | 1.29            | 0.28 |
| FLP-60      | 0.26           | 3.44           | 0.10                  | 3.80                    | 1.20            | 0.38 |
| FLP-50      | 0.25           | 3.42           | 0.12                  | 3.79                    | 1.24            | 0.38 |
| FLP-40      | 0.13           | 3.36           | 0.09                  | 3.58                    | 1.41            | 0.31 |
| FLP-20      | 0.28           | 3.31           | 0.34                  | 3.93                    | 1.43            | 0.34 |

**Table S2.** Characterization results of GPC for Lignin.

|      | Mn   | Mw   | DPI  |
|------|------|------|------|
| 100% | 2867 | 5029 | 1.75 |
| 60%  | 2705 | 5010 | 1.85 |
| 50%  | 2741 | 4762 | 1.74 |
| 40%  | 2551 | 4342 | 1.70 |
| 20%  | 2500 | 4339 | 1.74 |

**Table S3.** The content of chemical groups of various fabrics determined by C1s of XPS spectra.

| Samples                  | Contents of chemical groups |      |     |         |
|--------------------------|-----------------------------|------|-----|---------|
|                          | O-C-O                       | C-OH | C=C | C-C/C-H |
| Pristine cotton fabric   | 14%                         | 42%  | 32% | 12%     |
| FLP-50/Fe@ cotton fabric | 15%                         | 42%  | 21% | 22%     |

**Table S4.** The content of chemical groups of various fabrics determined by O1s of XPS spectra.

| Samples                  | Contents of chemical groups |       |     |        |
|--------------------------|-----------------------------|-------|-----|--------|
|                          | O-H                         | C-O-C | C-O | Fe-O-C |
| Pristine cotton fabric   | 33%                         | 65%   | 2%  | 0%     |
| FLP-50/Fe@ cotton fabric | 42%                         | 53%   | 3%  | 2%     |

**Table S5** Comparison of oil-water separation efficiency for various materials.

| Raw material                                                              | Types of oil               | Separation efficiency | WCA(°)   | Reference  |
|---------------------------------------------------------------------------|----------------------------|-----------------------|----------|------------|
| AEL-FP                                                                    | Chloroform                 | 98.6 %                | 168      | 1          |
| AL/RGO@PDA<br>Composite membrane                                          | Corn cooking oil           | 99.7 %                | 35 to 67 | 2          |
| Acetylated<br>Lignin/Melamine<br>Formaldehyde(ALMF)<br>Sponge             | Trichloromethane           | 140.0 g/g             | 138.5    | 3          |
| SMA-DMAEMA-<br>KH570 modified lignin-<br>based aerogels                   | Chloroform                 | 40.2 g/g              | 150      | 4          |
| Lignin-cellulose<br>functionalized graphene<br>(LCG) sponge               | DMSO                       | 102.3 g/g             | 110      | 5          |
| lignin-modified graphene<br>aerogel (LGA)                                 | Carbon<br>tetrachloride    | 96%                   | 127      | 6          |
| A lignin-based carbon<br>aerogel enhanced by<br>graphene oxide<br>(LCAGO) | Chloroform                 | 34.5 g/g              | 150      | 7          |
| T-SA/lignin <sup>x</sup> /rGO-<br>MTMS                                    | Chloroform                 | 13.2 g/g              | 161      | 8          |
| FLP-50/Fe@<br>fabric                                                      | cotton<br>Trichloromethane | 99.6%                 | 149      | This study |
|                                                                           | Hexane                     | 99.4%                 |          |            |
|                                                                           | Toluene                    | 98.7%                 |          |            |
|                                                                           | Dichloromethane            | 99.6%                 |          |            |

## References

- 1 X. Gong, Y. Meng, J. Zhu, X. Wang, J. Lu, Y. Cheng, Y. Tao and H. Wang, *Ind Crops Prod*, 2021, **166**, 113471.
- 2 W. Xie, M. Chen, S. Wei, Z. Huang and Z. Li, *Colloid surface A*, 2022, **648**, 129190.
- 3 H. Yu, W. Zhan and Y. Liu, *Waste Biomass Valor*, 2020, **11**, 4561–4569.
- 4 J. Jiang, Q. Zhang, X. Zhan and F. Chen, *ACS Sustainable Chem. Eng.*, 2017, **5**, 10307–10316.
- 5 D. K. Kulal, R. V. Khose, D. A. Pethsangave, P. H. Wadekar and S. Some, *Chem. Select*, 2019, **4**, 4568–4574.
- 6 C. Chen, F. Li, Y. Zhang, B. Wang, Y. Fan, X. Wang and R. Sun, *Chem. Eng. J*, 2018, **350**, 173–180.
- 7 Y. Meng, T. Liu, S. Yu, Y. Cheng, J. Lu and H. Wang, *Fuel*, 2020, **278**, 118376.
- 8 Y.-H. Jiang, Y.-Q. Zhang, C. Gao, Q.-D. An, Z.-Y. Xiao and S.-R. Zhai, *Sep. Purif. Technol.*, 2022, **282**, 120138.
